# Supplementary material
Source: PubMed Central journal article supplement (PMC10026877)
Supplement: KCCY_A_2154556_SM3219.pdf [file KCCY_A_2154556_SM3219.pdf]

## Change of authorship request form - Journals

**Title of manuscript:** LncRNA FAM138B inhibits the progression of non-small cell lung cancer through miR-105-5p

**Journal Name:** Cell Cycle

**Manuscript ID no.:** KCCY-2021-0756R1

1. Current Authorship list, in the order shown on the manuscript. Please indicate the corresponding author with a \*

| Current Author list    | First name(s) | Family name | Email address         |
|------------------------|---------------|-------------|-----------------------|
| 1 <sup>st</sup> author | Jin           | Chai        | chxue1461940@163.com  |
| 2 <sup>nd</sup> author | Li            | Qin         | qinqi6238220@163.com  |
| 3 <sup>rd</sup> author | Guangxin      | Zhang       | xhuscaobu0236@163.com |
| 4 <sup>th</sup> author | Peiyan        | Hua         | huopei0294342@163.com |
| 5 <sup>th</sup> author | Chengyan      | Jin *       | jinchengyan_2@163.com |

*Please insert new rows if needed*

2. Please provide an explanation for the change in authorship (including any reasons for removal from authorship list).

We're sorry to cause trouble to the editor's work. Due to the sudden outbreak of the COVID-19 epidemic in Changchun city, our hospital has a very busy job. And because of the city blockade, we can't conduct research and experiments can't work properly. So we turned to former colleagues (Tinghong Pan, Hui Wang and Shuai Wang) who were in the same research group to help us with this research. They previously participated in the design of this study and further investigated the correlation of down-regulation of lncRNA FAM138B with TNM stage and lymph node metastasis, and provided bar graphs for better visualization. In order to further verify the relationship between FAM138B and miR-105-5p, this paper supplemented the rescue experiment. They have contributed greatly to the improvement of the quality of the manuscript, and they meet the requirements of the authors, so all authors agree to add them to the author list and sign below.

3. Proposed new authorship list (including email addresses), in the order it should appear on the manuscript. Please indicate the corresponding author with a \*

| New Author list and order | First name(s) | Family name | Email address            | Contribution of authors (please see our <a href="#">authorship criteria</a> ) |
|---------------------------|---------------|-------------|--------------------------|-------------------------------------------------------------------------------|
| 1 <sup>st</sup> author    | Tinghong      | Pan *       | pantinghong_yidu@163.com | Design and modification                                                       |

|                        |          |      |                       |                            |
|------------------------|----------|------|-----------------------|----------------------------|
| 2 <sup>nd</sup> author | Hui      | Wang | whjyvsiv46564@163.com | Design and modification    |
| 3 <sup>rd</sup> author | Shuai    | Wang | shuaitou89775@163.com | Design and modification    |
| 4 <sup>th</sup> author | Jin      | Chai | chxue1461940@163.com  | Experiment and analysis    |
| 5 <sup>th</sup> author | Chengyan | Jin✳ | jinchengyan_2@163.com | Interpretation and writing |

Please insert new rows if needed

**4. All authors, unchanged, new and removed must sign this declaration.**

Signatures can be in the form of docu-sign, or handwritten signatures can be returned as an image file.

Typed names in the signature box WILL NOT be accepted unless accompanied by an additional email confirmation from that co-author agreeing to the new author list and the explanation of changes outlined in Section 2. This email must come from the same email address assigned to that co-author in the above sections.

| Author name (first name, last name) | Declaration                                                                                                           | Signature (if typed please ensure confirmation via email is attached) | Date signed   |
|-------------------------------------|-----------------------------------------------------------------------------------------------------------------------|-----------------------------------------------------------------------|---------------|
| Tinghong Pan                        | I agree to the new authorship list and contributions shown above in section 3, for the reasons outlined in section 2. | Tinghong Pan                                                          | May. 15. 2022 |
| Hui Wang                            | I agree to the new authorship list and contributions shown above in section 3, for the reasons outlined in section 2. | Hui Wang                                                              | May. 15. 2022 |
| Shuai Wang                          | I agree to the new authorship list and contributions shown above in section 3, for the reasons outlined in section 2. | Shuai Wang                                                            | May. 15. 2022 |
| Jin Chai                            | I agree to the new authorship list and contributions shown above in section 3, for the reasons outlined in section 2. | Jin Chai                                                              | may 15. 2022  |
| Chengyan Jin                        | I agree to the new authorship list and contributions shown                                                            | Chengyan Jin                                                          | May 15. 2022  |

|                |                                                                                                                       |                |               |
|----------------|-----------------------------------------------------------------------------------------------------------------------|----------------|---------------|
|                | above in section 3, for the reasons outlined in section 2.                                                            |                |               |
| Li Qin         | I agree to the new authorship list and contributions shown above in section 3, for the reasons outlined in section 2. | Li Qin         | May. 15. 2022 |
| Guangxin Zhang | I agree to the new authorship list and contributions shown above in section 3, for the reasons outlined in section 2. | Guangxin Zhang | May 15. 2022  |
| Peiyan Hua     | I agree to the new authorship list and contributions shown above in section 3, for the reasons outlined in section 2. | Peiyan Hua     | May 15. 2022  |
